# Supplementary material
Source: Research Square preprint supplement (doi:10.21203/rs.3.rs-8940721/v1)
Supplement: Supplementary file 1 [file b334b5aed13ed4fba5d2b057.docx]

Supplementary Table 1: Comparison of seismic event detections by Geo-Sense, the MARS DAS installation, OBX-90 instrument (the one closest to the Geo-Sense cable), and the USGS catalogue. Event type and apparent arrival side are included.

| **Date (UTC)** | **Time (UTC)** | **Geo-Sense** | **MARS** | **OBX90** | **USGS (magnitude)** | **Event type** | **Apparent arrival side** |
| --- | --- | --- | --- | --- | --- | --- | --- |
| 28-Jan-25 | 23:14 | Detected | Detected | Detected | 1.82 | Earthquake | East |
| 29-Jan-25 | 8:40 | Weak detection | Weak detection | Weak detection |  |  |  |
| 29-Jan-25 | 23:29 | Detected | Detected | Not detected | 1.13 | Earthquake | East |
| 30-Jan-25 | 6:13 | Detected | Detected | Detected | 1.62 | Earthquake | East |
| 30-Jan-25 | 6:37 | Weak detection | Weak detection | Not detected |  |  |  |
| 30-Jan-25 | 18:43 | Detected | Detected | Detected | 2.09 | Earthquake | East |
| 30-Jan-25 | 19:07 | Weak detection | Weak detection | Not detected | 1.13 | Earthquake | East |
| 30-Jan-25 | 19:17 | Detected | Detected | Detected | 2.34 | Earthquake | East |
| 30-Jan-25 | 21:36 | Detected | Detected | Detected | 1.85 | Earthquake | East |
| 31-Jan-25 | 0:43 | Detected | Detected | Detected |  | Unknown |  |
| 31-Jan-25 | 5:07 | Weak detection | Weak detection | Not detected |  | Earthquake | East |
| 31-Jan-25 | 7:13 | Detected | Not detected | Not detected |  | Unknown |  |
| 31-Jan-25 | 7:35 | Detected | Detected | Detected | 2.21 | Earthquake | East |
| 31-Jan-25 | 7:50 | Detected | Detected | Weak detection |  | Hydroacoustic | West |
| 31-Jan-25 | 8:05 | Weak detection | Weak detection | Detected |  | Unknown |  |
| 31-Jan-25 | 10:07 | Detected | Detected | Detected | 1.57 | Earthquake | East |
| 31-Jan-25 | 10:16 | Weak detection | Weak detection | Not detected |  | Unknown |  |
| 31-Jan-25 | 10:52 | Detected | Weak detection | Weak detection | 0.94 | Earthquake | East |
| 31-Jan-25 | 10:53 | Detected | Weak detection | Weak detection | 1.56 | Earthquake | East |
| 31-Jan-25 | 11:48 | Detected | Detected | Detected | 1.77 | Earthquake | East |
| 31-Jan-25 | 12:21 | Weak detection | Not detected | Weak detection | 0.94 | Earthquake | East |
| 31-Jan-25 | 12:34 | Detected | Detected | Detected | 2.13 | Earthquake | East |
| 31-Jan-25 | 13:47 | Detected | Detected | Detected | 2.39 | Earthquake | East |
| 31-Jan-25 | 14:06 | Detected | Weak detection | Detected | 1.28 | Earthquake | East |
| 31-Jan-25 | 16:16 | Detected | Detected | Detected | 1.56 | Earthquake | East |
| 31-Jan-25 | 17:45 | Detected | Detected | Detected |  | Hydroacoustic | West |
| 31-Jan-25 | 19:01 | Detected | Weak detection | Not detected |  | Unknown |  |
| 31-Jan-25 | 21:03 | Weak detection | Not detected | Not detected |  | Unknown |  |
| 31-Jan-25 | 21:17 | Detected | Weak detection | Weak detection |  | Hydroacoustic | West |
| 01-Feb-25 | 0:02 | Detected | Detected | Detected |  | Unknown |  |
| 01-Feb-25 | 0:09 | Detected | Detected | Detected | 1.63 | Earthquake | East |
| 01-Feb-25 | 0:24 | Detected | Detected | Detected | 2.2 | Earthquake | East |
| 01-Feb-25 | 6:23 | Weak detection | Not detected | Not detected |  | Unknown |  |
| 01-Feb-25 | 6:32 | Detected | Detected | Detected | 1.93 | Earthquake | East |
| 01-Feb-25 | 6:55 | Weak detection | Weak detection | Detected |  | Hydroacoustic | West |
| 01-Feb-25 | 7:13 | Detected | Detected | Detected | 1.8 | Earthquake | East |
| 01-Feb-25 | 11:29 | Detected | Detected | Not detected |  | Hydroacoustic | West |
| 01-Feb-25 | 13:10 | Detected | Detected | Weak detection | 1.48 | Earthquake | East |
| 01-Feb-25 | 16:54 | Detected | Not detected | Detected |  | Unknown |  |
| 02-Feb-25 | 2:20 | Weak detection | Weak detection | Weak detection | 0.82 | Earthquake | East |
| 02-Feb-25 | 3:16 | Detected | Detected | Detected | 1.97 | Earthquake | East |
| 02-Feb-25 | 15:03 | Detected | Weak detection | Weak detection | 2.26 | Earthquake | East |
| 03-Feb-25 | 4:07 | Weak detection | Weak detection | Not detected | 1.6 | Earthquake | East |
| 03-Feb-25 | 4:46 | Weak detection | Weak detection | Detected |  | Hydroacoustic | West |
| 03-Feb-25 | 7:10 | Detected | Weak detection | Detected | 1.69 | Earthquake | East |
| 03-Feb-25 | 12:06 | Detected | Detected | Detected |  | Hydroacoustic | West |
| 03-Feb-25 | 13:30 | Detected | Not detected | Not detected |  | Unknown |  |
| 03-Feb-25 | 17:10 | Detected | Detected | Detected | 2.16 | Earthquake | East |
| 03-Feb-25 | 21:58 | Detected | Weak detection | Detected | 1.43 | Earthquake | East |
| 04-Feb-25 | 0:55 | Detected | Weak detection | Detected |  | Unknown |  |
| 04-Feb-25 | 1:09 | Detected | Weak detection | Detected | 2.17 | Earthquake | East |
| 04-Feb-25 | 18:05 | Detected | Detected | Not detected |  | Hydroacoustic | West |
| 04-Feb-25 | 18:12 | Detected | Detected | Detected | 2.89 | Earthquake | East |
| 04-Feb-25 | 18:42 | Weak detection | Weak detection | Detected | 0.84 | Earthquake | East |
| 04-Feb-25 | 20:12 | Detected | Weak detection | Detected |  | Earthquake | East |
| 05-Feb-25 | 1:40 | Weak detection | Weak detection | Detected |  | Hydroacoustic | West |
| 05-Feb-25 | 2:26 | Detected | Not detected | Not detected |  | Unknown |  |
| 05-Feb-25 | 5:02 | Detected | Detected | Detected |  | Hydroacoustic | West |
